# Supplementary material
Source: PubMed Central journal article supplement (PMC10411218)
Supplement: NIHMS1906962-supplement-2.pdf [file NIHMS1906962-supplement-2.pdf]

**Table S1: Trivalent VLP immunization elicits  $\alpha$ -EEV mAbs of diverse genetic lineages in NHP, related to Figures 1-3.**

IgG heavy and light chain variable region genes of single-specific and triple-specific  $\alpha$ -EEV mAbs were amplified, sequenced, codon optimized, synthesized, and cloned into mammalian expression vectors. Included in the table: V-gene and allele, percent V-gene identity, CDR3 length, and CDR3 sequence for both heavy chain and kappa/lambda light chain. If two V genes are shown, it means that the assignment was ambiguous.

| Specificity | mAb   | IGHV                                    |       |                          |                  | IGKV/IGLV                            |       |                  |               | Lineage ID |
|-------------|-------|-----------------------------------------|-------|--------------------------|------------------|--------------------------------------|-------|------------------|---------------|------------|
|             |       | V-Gene and allele                       | % SHM | CDRH3                    | CDR3-IMGT length | V-Gene and allele                    | % SHM | CDR3-IMGT length | CDRL3         |            |
| E           | SKE01 | IGHV4-NL_42*01_S8550                    | 4.4   | CARHAAYCSRGVCYAGLDDAFGFW | 22               | IGLV3-40*01                          | 5.5   | 11               | CQVWSSSQHSVF  | 10710.E1   |
| E           | SKE02 | IGHV4-117*01_S6852                      | 7.1   | CATKEGIEYCSGRGCSFNSLDVW  | 21               | IGLV3-40*01                          | 8     | 11               | CQVWSSSYWVWF  | 10710.E2   |
| E           | SKE03 | IGHV4-NL_10*01_S4164                    | 7.5   | CARGAGTWNTEYFELW         | 14               | IGLV3-40*01                          | 5.9   | 11               | CQVWSSSDHRVF  | 10710.E3   |
| E           | SKE04 | IGHV4-NL_5*01_S6960                     | 7     | CARGGYTGNYPFDVW          | 12               | IGLV3-40*01                          | 4.5   | 11               | CQVWSSSDHPLF  | 10710.E4   |
| E           | SKE05 | IGHV4-NL_5*01_S6960                     | 2.6   | CARGGLRGNYPFDVW          | 12               | IGLV3-40*01                          | 2.1   | 11               | CQVWSSSDHPLF  | 10710.E5   |
| E           | SKE06 | IGHV4-NL_27*01_S1515                    | 5.7   | CARDSTVRGGLDVW           | 12               | IGLV3-40*01                          | 5.2   | 11               | CQVWSDSTSHYIF | 10710.E6   |
| E           | SKE07 | IGHV4-NL_10*01_S4164                    | 1.4   | FARGAGTWNTEYFELW         | 14               | IGKV2-72*02                          | 7.6   | 9                | CMQAIQLPLTF   | 10710.E7   |
| E           | SKE08 | IGHV4-NL_5*01_S6960                     | 6.6   | CAGDRVTASNSLDI           | 13               | IGKV2-72*02                          | 7     | 9                | CMQAIQLPLTF   | 10710.E8   |
| E           | SKE09 | IGHV4-NL_5*01_S6960                     | 5.3   | CAGDRVTASNSLDI           | 13               | IGKV2-72*02                          | 7.3   | 9                | CMQAIQLPLTF   | 10710.E8   |
| E           | SKE10 | IGHV4-NL_5*01_S6960                     | 2.6   | CAGDSVTHINSLDVW          | 13               | IGKV2-72*02                          | 4.6   | 9                | CMQGIQLPLTF   | 10710.E9   |
| E           | SKE11 | IGHV4-NL_5*01_S6960                     | 7.9   | CAGDAVTQYNLSLVW          | 13               | IGKV2-72*02                          | 7.3   | 9                | CMQARQLPLTF   | 10710.E10  |
| E           | SKE12 | IGHV4-NL_28*01_S1005                    | 6.1   | CARRWSEYCNSTYCTGAFDLW    | 19               | IGKV3-10*02                          | 7.3   | 8                | CFQYHSGWTF    | 10710.T10  |
| E           | SKE13 | IGHV4-NL_5*01_S6960, IGHV4-117*01_S7493 | 12    | CARQDYDSEYQGTPELW        | 16               | IGKV3-10*02                          | 7.7   | 8                | CHQYYSGYSF    | 10710.E11  |
| E           | SKE14 | IGHV4-NL_5*01_S6960                     | 7.3   | CARQDYYSQDYQGAFDLW       | 16               | IGKV3-10*02                          | 4.5   | 8                | CHQYYSGYSF    | 10710.E11  |
| E           | SKE15 | IGHV4-NL_5*01_S6960, IGHV4-117*01_S7493 | 9.9   | CARQDYLGVVDYQGAFELW      | 16               | IGKV3-10*02                          | 9.4   | 8                | CHQYYSGHSF    | 10710.E11  |
| E           | SKE16 | IGHV4-NL_16*01_S2138                    | 13    | CASDRPFDWFASTWFDVW       | 17               | IGLV1-60*01                          | 3     | 11               | CAAWDDSLSGYIF | 10710.E12  |
| E           | SKE17 | IGHV4-NL_13*01_S9273                    | 7.7   | CATTEMILSNYYGLDSW        | 15               | IGKV1-43*02                          | 8.7   | 9                | CLQYDIAPWSF   | 10710.E13  |
| E           | SKE18 | IGHV4-NL_13*01_S9273                    | 2.7   | CATTGVIIITNYGLDSW        | 15               | IGKV1-43*02                          | 8.4   | 9                | CLQYDIAPWSF   | 10710.E13  |
| E           | SKE19 | IGHV4-117*01_S7493                      | 8.3   | CARGIPDYSGSYYYALDFW      | 17               | IGLV1-72*02+G267T                    | 4.4   | 11               | CSAWDDSLSGPLF | 10710.E14  |
| E           | SKE20 | IGHV4-NL_27*01_S5720                    | 4.7   | CASPFPGSGYYVNNFYW        | 16               | IGLV1-64*01                          | 3.7   | 11               | CLSYDVLSAHLF  | 10710.E15  |
| E           | SKE21 | IGHV4-NL_27*01_S5720                    | 6.7   | CASDWHKWNQNGGYPEFW       | 16               | IGLV3-44*01+70531                    | 3.5   | 11               | CQVWDTSDHVVF  | 10710.E16  |
| E           | SKE22 | IGHV4-79*01                             | 4.7   | CARDEHYNFWRGFWYW         | 14               | IGLV2-32*02+T122C.C130A              | 5.4   | 10               | CSYTSDDTGLF   | 10710.E17  |
| E           | SKE23 | IGHV4-NL_27*01_S1515                    | 5.4   | CVTVGTLPEYALDSW          | 13               | IGLV2S8*01                           | 5.1   | 10               | CFSYTTSRWVWF  | 10710.E18  |
| E           | SKE24 | IGHV4-NL_13*01_S9273                    | 6.4   | CASRGGNYGLDSW            | 11               | IGKV1-16*01                          | 4.9   | 9                | CQQYKDAPWTF   | 10710.E19  |
| E           | SKE25 | IGHV5-157*01_S8626                      | 11    | CARSVWSGYYIGWFDVW        | 15               | IGKV2-72*02                          | 7     | 9                | CMQVLIQVPLTF  | 10710.E20  |
| E           | SKE26 | IGHV5-157*01_S8626                      | 6.1   | CARSVWSGYYIGWFDVW        | 15               | IGKV2-72*02                          | 7     | 9                | CMQVLIQVPLTF  | 10710.E20  |
| E           | SKE27 | IGHV5-157*01_S8626                      | 9.1   | CARSVWSGYYIGWFDVW        | 15               | IGKV2-72*02                          | 6.3   | 9                | CMQVLIQVPLTF  | 10710.E20  |
| E           | SKE28 | IGHV5-157*01_S8626                      | 8.4   | CAMGGYPTYPFDVW           | 11               | IGKV1-28*03                          | 5.6   | 9                | CLQYHTYPPFTF  | 10710.E21  |
| E           | SKE29 | IGHV5-157*01_S8626                      | 7.8   | CAMGGYPTYPFDVW           | 11               | IGLV5-83*02                          | 2.2   | 9                | CMQWHNNVWVF   | 10710.E22  |
| E           | SKE30 | IGHV3-NL_18*01_S7220                    | 3.6   | CATAQGPSTVTPDYW          | 13               | IGKV1-43*02                          | 9.1   | 9                | CLQYDSAPWTF   | 10710.E23  |
| E           | SKE31 | IGHV3-NL_18*01_S7220                    | 4.3   | CATTKGPSTVTPYYW          | 13               | IGKV1-43*02                          | 8.7   | 9                | CLQYDIAPWSF   | 10710.E23  |
| E           | SKE32 | IGHV3-73*02_S0606                       | 3     | CTRDDYGYSDVW             | 11               | IGKV1-74*01                          | 4.9   | 9                | CQHNSGFPYSF   | 10710.E24  |
| E           | SKE33 | IGHV3-36*01_S6650                       | 3     | CARLFRGYCSSTFCFKWFDVW    | 19               | IGKV1-32*03+48222                    | 6     | 9                | CQQGHSIPYSF   | 10710.E25  |
| V           | SKV01 | IGHV4-NL_30*01_S1240                    | 3.4   | CARHAYCTSSGGYPPHNWFDVW   | 20               | IGKV1-66*01                          | 7     | 9                | CQQYDNSPFTF   | 10710.V1   |
| V           | SKV02 | IGHV4-NL_5*01_S8913                     | 2     | CARDQEPWSGYYTVIHDAFDVW   | 20               | IGKV1-22*01+ A152G.C176A.C237T.T265A | 4.5   | 9                | CQQYNSLPFTF   | 10710.V2   |
| V           | SKV03 | IGHV4-79*01                             | 7.1   | CAKGSCHSRGVCDFVFNWFDVW   | 19               | IGLV7-80*01+C245T.G271T              | 8.2   | 9                | CLLYYRGVWVF   | 10710.V3   |
| V           | SKV04 | IGHV4-NL_27*01_S5720                    | 2     | CANSISILGVVITGAFYYW      | 17               | IGKV1-38*01                          | 4.2   | 9                | CQQRHSYPWTF   | 10710.V4   |
| V           | SKV05 | IGHV4-NL_27*01_S5720                    | 9.7   | CASSNSILGVVIAGAFHFW      | 17               | IGKV1-38*01                          | 11    | 9                | CQQRHAYPWTF   | 10710.V4   |
| V           | SKV06 | IGHV4-117*01_S6852                      | 5.4   | CAREAHCSDSGCPFPFDVW      | 17               | IGKV1-22*01+87145                    | 3.9   | 9                | CLQDSSPTPLTF  | 10710.V5   |
| V           | SKV07 | IGHV4-NL_12*01_S6471                    | 4.7   | CAREGGHSSSLDNYGLDWT      | 17               | IGKV1-32*03+48222                    | 5.3   | 9                | CQQGHSFPYSF   | 10710.V6   |
| V           | SKV08 | IGHV4-117*01_S6852                      | 4.7   | CAREGGYSGSYRPEFW         | 15               | IGKV1-32*03+48222                    | 8.8   | 9                | CQQHYRTPYSF   | 10710.V7   |
| V           | SKV09 | IGHV4-NL_42*01_S8550                    | 7.1   | CASGSGDWFGYFYRW          | 13               | IGKV1-22*01+ A152G.C176A.C237T.T265A | 5.6   | 9                | CQQYISRPWTF   | 10710.V8   |
| V           | SKV10 | IGHV4-149*01_S4098                      | 9.1   | CAIDGANRYAFDLW           | 12               | IGLV2-23*02                          | 6.4   | 10               | CCSYAGSNPWIF  | 10710.V9   |
| V           | SKV11 | IGHV4-NL_5*01_S6960                     | 8.4   | CVREAYGTIFYFVW           | 11               | IGKV1-25*02                          | 14    | 9                | CLQHSRHPFSF   | 10710.V10  |
| V           | SKV12 | IGHV4-NL_5*01_S6960                     | 7.3   | CVREAYGTIFYFVW           | 11               | IGKV1-25*02                          | 12    | 9                | CQHSRHPFSF    | 10710.V10  |
| V           | SKV13 | IGHV4-NL_16*01_S2138                    | 1.7   | CAREEYWGDPYYW            | 11               | IGKV3S9*01+IGKV3-42*02               | 5.9   | 9                | CQQYNNWLWTF   | 10710.V11  |
| V           | SKV14 | IGHV3-NL_9*01_S6098                     | 6.4   | CAKGYPSYLYFW             | 10               | IGLV7-80*01+C245T.G271T              | 4.4   | 9                | CLLYYSGVHIF   | 10710.V12  |
| V           | SKV15 | IGHV3-NL_9*01_S6098                     | 7.1   | CAQGFPPYVLFWSW           | 10               | IGLV7-80*01+C245T.G271T              | 4.8   | 9                | CLLYYGGTQLF   | 10710.V13  |
| V           | SKV16 | IGHV3-122*01_S8388                      | 6.1   | CARDSPYWGDIYSHSLDVW      | 16               | IGLV3-40*01                          | 4.6   | 10               | CQVWSSSDVLF   | 10710.V14  |
| V           | SKV17 | IGHV3-36*01_S6650                       | 13    | CVRRDYDGLSLDVW           | 11               | IGLV1-64*01                          | 3.4   | 11               | CLSYDSSLSTHLF | 10710.V15  |
| V           | SKV18 | IGHV3-NL_5*01_S4429                     | 6.3   | CTTSVWV                  | 5                | IGKV1-66*01                          | 8.7   | 9                | CQQHNSPYNF    | 10710.V16  |
| V           | SKV19 | IGHV3-122*01_S8388, IGHV3-94*01         | 10    | CARDPVMTTVATQLLDVW       | 16               | IGLV1-60*01                          | 1.7   | 11               | CAAWDDSLSGYIF | 10710.V17  |
| V           | SKV20 | IGHV2-69*01_S0230                       | 6.3   | CAFLVVLTKWFDVW           | 12               | IGLV1-65*01+44178                    | 7.2   | 11               | CGTWDNSLTSVLF | 10710.V18  |

(continued on next page)

Table S1 (continued)

| Specificity | mAb   | IGHV                                                                |       |                           |                         | IGKV/IGLV                               |       |                         |                 |            |
|-------------|-------|---------------------------------------------------------------------|-------|---------------------------|-------------------------|-----------------------------------------|-------|-------------------------|-----------------|------------|
|             |       | V-Gene and allele                                                   | % SHM | CDRH3                     | CDR3-<br>IMGT<br>length | V-Gene and allele                       | % SHM | CDR3-<br>IMGT<br>length | CDRL3           | Lineage ID |
| W           | SKW01 | IGHV4-NL_42*01_S8550,<br>IGHV4-117*01_S6852,<br>IGHV4-NL_1*02_S9550 | 7.4   | CARQGLAGTTRDWFVDV         | 15                      | IGKV1-38*01                             | 5.9   | 9                       | CQHRNDYPFTF     | 10710.W1   |
| W           | SKW02 | IGHV4-NL_1*02_S9550,<br>IGHV4-NL_42*01_S8550                        | 6.4   | CARQGLAGTTRDWFVDV         | 15                      | IGKV1-38*01                             | 4.9   | 9                       | CQHRNSYPFTF     | 10710.W1   |
| W           | SKW03 | IGHV4-NL_42*01_S8550,<br>IGHV4-NL_1*02_S9550                        | 4.7   | CARQGLAGTTRDWFVDV         | 15                      | IGKV1-38*01                             | 3.5   | 9                       | CQHRNSYPFTF     | 10710.W1   |
| W           | SKW04 | IGHV4-NL_1*02_S9550                                                 | 6.4   | CARQGLAGTTRDWFVDV         | 15                      | IGKV1-38*01                             | 6.3   | 9                       | CQQRNDYPFTF     | 10710.W1   |
| W           | SKW05 | IGHV4-NL_42*01_S8550,<br>IGHV4-NL_1*02_S9550                        | 7.4   | CARQGLAGTTRDYPVDV         | 15                      | IGKV1-38*01                             | 3.5   | 9                       | CQQRNSYPFTF     | 10710.W1   |
| W           | SKW06 | IGHV4-117*01_S6852,<br>IGHV4-NL_42*01_S8550                         | 10    | CARQGLEGTTRDWFVDV         | 15                      | IGKV1-38*01                             | 9.4   | 9                       | CQQRNDYPFTF     | 10710.W1   |
| W           | SKW07 | IGHV4-NL_42*01_S8550,<br>IGHV4-NL_1*02_S9550                        | 7.4   | CARQGLEGTTRDWFVDV         | 15                      | IGKV1-38*01                             | 6.6   | 9                       | CQQRNDYPFTF     | 10710.W1   |
| W           | SKW08 | IGHV4-NL_42*01_S8550                                                | 7.4   | CARQGLPGTTRDWFVDV         | 15                      | IGKV1-38*01                             | 7.3   | 9                       | CQQRNDYPFTF     | 10710.W1   |
| W           | SKW09 | IGHV4-117*01_S6852                                                  | 7.4   | CASRSSVADNWFVDV           | 13                      | IGKV1-22*01+<br>A152G.C176A.C237T.T265A | 9.1   | 9                       | CQQYDSRPWTF     | 10710.W2   |
| W           | SKW10 | IGHV4-117*01_S6852                                                  | 7.4   | CASRSSVADNWFVDV           | 13                      | IGKV1-22*01+<br>A152G.C176A.C237T.T265A | 8     | 9                       | CQQYDSRPWTF     | 10710.W2   |
| W           | SKW11 | IGHV4-117*01_S6852                                                  | 9.1   | CASRTTVADNWFVDV           | 13                      | IGKV1-22*01+<br>A152G.C176A.C237T.T265A | 8     | 9                       | CQQHDSRPWTF     | 10710.W2   |
| W           | SKW12 | IGHV4-117*01_S6852                                                  | 5.4   | CASRTTVADNWFVDV           | 13                      | IGKV1-22*01+<br>A152G.C176A.C237T.T265A | 6.3   | 9                       | CQQYDSRPWTF     | 10710.W2   |
| W           | SKW13 | IGHV4-117*01_S6852                                                  | 5.4   | CASRTTVADNWFVDV           | 13                      | IGKV1-22*01+<br>A152G.C176A.C237T.T265A | 6.3   | 9                       | CQQFNSRPWTF     | 10710.W2   |
| W           | SKW14 | IGHV4-NL_27*01_S5720                                                | 6.4   | CALAKYSGSPGDY             | 12                      | IGLV2-32*02+<br>T122C.C130A             | 6.1   | 12                      | CSSYSGIDTDYIF   | 10710.W3   |
| W           | SKW15 | IGHV4-NL_27*01_S5720                                                | 7.4   | CALAKYSGSPGDY             | 12                      | IGLV2-32*02+<br>T122C.C130A             | 8.1   | 12                      | CSSYSGSETDYIF   | 10710.W3   |
| W           | SKW16 | IGHV4-NL_13*01_S9273                                                | 9     | CASDENKPYW                | 8                       | IGKV4S1*01                              | 4.3   | 9                       | CQQYSSPRTF      | 10710.W4   |
| W           | SKW17 | IGHV4-NL_13*01_S9273                                                | 8.7   | CVGDENKIHV                | 8                       | IGKV4S1*01                              | 3.9   | 9                       | CQQYSSPRTF      | 10710.W4   |
| W           | SKW18 | IGHV4-NL_13*01_S9273                                                | 2.3   | CATDRNTLAW                | 8                       | IGKV4S1*01                              | 3.9   | 8                       | CQQYNSRRTF      | 10710.W5   |
| W           | SKW19 | IGHV3-76*02_S4190                                                   | 2.7   | CAKVGRSGYCTASGCNALLFDWFDV | 24                      | IGKV2-64*01+<br>G96A.A162C.G177T        | 4.6   | 9                       | CGQGAHLPPAF     | 10710.W6   |
| W           | SKW20 | IGHV3-76*02_S4190                                                   | 5.8   | CAKVGRSGYCTGSGCHALLFDWIDV | 24                      | IGKV2-64*01+<br>G96A.A162C.G177T        | 5     | 9                       | CGQGAHLPPAF     | 10710.W6   |
| W           | SKW21 | IGHV3-76*02_S4190                                                   | 5.1   | CAKVGRSGYCTGTGCVAVLFDWLDV | 24                      | IGKV2-64*01+<br>G96A.A162C.G177T        | 3.3   | 9                       | CGQGAHLPPAF     | 10710.W6   |
| W           | SKW22 | IGHV3-122*01_S8388                                                  | 5.1   | CAREGGYGFY                | 10                      | IGLV1-66*01                             | 6.4   | 11                      | CETWNSLNAYIF    | 10710.W7   |
| W           | SKW23 | IGHV3-122*01_S8388                                                  | 0.3   | CAREVGYGLDSV              | 10                      | IGLV1-66*01                             | 4.6   | 11                      | CETWNSLNGYIF    | 10710.W7   |
| W           | SKW24 | IGHV3-36*01_S6650+16915                                             | 1.7   | CARVVTESRPPAAWFDV         | 16                      | IGLV3-44*01+70531                       | 4.5   | 12                      | CQLWDISSDHNLYIF | 10710.W8   |
| W           | SKW25 | IGHV3-76*02_S4190                                                   | 4.4   | CMKDRSSGWYDWLPGERYLEWF    | 21                      | IGLV2-32*02+T122C.C130A                 | 3     | 11                      | CSSYAGSDTFYIF   | 10710.W9   |
| W           | SKW26 | IGHV3-73*02_S0606                                                   | 1.4   | CTREPSWGYSGHRSLDVW        | 16                      | IGLV2-32*02+T101C                       | 3.7   | 9                       | CSSFAGSNVLF     | 10710.W10  |
| W           | SKW27 | IGHV3-73*02_S0606                                                   | 8.8   | CTREPSWGYSRHKSLDVW        | 16                      | IGLV2-32*02+T101C                       | 7.7   | 9                       | CSSYAGSNVLF     | 10710.W10  |
| W           | SKW28 | IGHV3-73*02_S0606                                                   | 8.4   | CVREPSWGHRRHSLDVW         | 16                      | IGLV2-32*02+T101C                       | 6.4   | 9                       | CSSFVGTNVFF     | 10710.W10  |
| W           | SKW29 | IGHV3-76*02_S4190                                                   | 7.1   | CAKEKYSYSSAYGRGYPNSLDVW   | 21                      | IGKV2-104*01                            | 5.6   | 9                       | CMQPLEYPRTF     | 10710.W11  |
| W           | SKW30 | IGHV3-76*02_S4190                                                   | 8.1   | CAKEKYSYSSAYGRGYPNSLDVW   | 21                      | IGKV2-104*01                            | 5.3   | 9                       | CMQPLEYPRTF     | 10710.W11  |
| WEV         | SKT01 | IGHV3-NL_17*01_S0120                                                | 4     | CTTDDRRTYCSRGVYAAAFYHW    | 19                      | IGKV1-43*02                             | 7     | 9                       | CLQYNSAPFTF     | 10710.T1   |
| WEV         | SKT02 | IGHV3-NL_17*01_S0120                                                | 4.3   | CTTDDRRTYCSRGVYAAAFYHW    | 19                      | IGKV1-43*02                             | 7.3   | 9                       | CLQYNSAPFTF     | 10710.T1   |
| WEV         | SKT03 | IGHV3-NL_17*01_S0120                                                | 2.3   | CTTDDRRTYCSRGVYAAAFYHW    | 19                      | IGKV1-43*02                             | 7.7   | 9                       | CLQYNSAPFTF     | 10710.T1   |
| WEV         | SKT04 | IGHV3-NL_17*01_S0120                                                | 2.3   | CTTDDRRTYCSRGVYAAAFYHW    | 19                      | IGKV1-43*02                             | 9.8   | 9                       | CLQYNSAPFTF     | 10710.T1   |
| WEV         | SKT05 | IGHV3-NL_17*01_S0120                                                | 4.6   | CTRDDRRTYCSRGVYAAAFYHW    | 19                      | IGKV1-43*02                             | 11    | 9                       | CLQYNSAPFTF     | 10710.T1   |
| WEV         | SKT06 | IGHV3-122*01_S8388                                                  | 2.4   | CARLAGTAHGW               | 9                       | IGLV1-64*01                             | 0.7   | 11                      | CLSYDSSLSAYIF   | 10710.T2   |
| WEV         | SKT07 | IGHV4-149*01_S4098                                                  | 8.1   | CTIGVVAAGLIEYW            | 14                      | IGKV2-72*02                             | 4.6   | 9                       | CVQAIAPYFSF     | 10710.T3   |
| WEV         | SKT08 | IGHV4-NL_13*01_S9273                                                | 6     | CVDIVGGATDYFEFV           | 13                      | IGLV1-72*02+G267T                       | 4.7   | 11                      | CSAWDSSVSGRVF   | 10710.T4   |
| WEV         | SKT09 | IGHV4-NL_13*01_S9273                                                | 6.4   | CVDIVGGATDYFEFV           | 13                      | IGLV1-72*02+G267T                       | 4.7   | 11                      | CSAWDSSVSGRVF   | 10710.T4   |
| WEV         | SKT10 | IGHV4-NL_13*01_S9273                                                | 5.7   | CVNIMGGETDYFEFV           | 13                      | IGLV1-72*02+G267T                       | 4.1   | 11                      | CSAWDSSVSGRVF   | 10710.T4   |
| WEV         | SKT11 | IGHV4-NL_13*01_S9273                                                | 2.7   | CASIVGGATDYFEFV           | 13                      | IGLV1-72*02+G267T                       | 1.4   | 11                      | CSAWDSSVSGRVF   | 10710.T4   |
| WEV         | SKT12 | IGHV4-NL_13*01_S9273                                                | 7.7   | CANIVGGATDYFEFV           | 13                      | IGLV1-72*02+G267T                       | 2.4   | 11                      | CSAWDSSVSGRVF   | 10710.T4   |
| WEV         | SKT13 | IGHV4-NL_13*01_S9273                                                | 7     | CASIVGGATDYFEFV           | 13                      | IGLV1-72*02+G267T                       | 2.4   | 11                      | CSAWDSSVSGRVF   | 10710.T4   |
| WEV         | SKT14 | IGHV3-187*01_S1387                                                  | 6.3   | CVRGWRVYCRNSGCSAFAFDVW    | 19                      | IGLV3-44*01+70531                       | 2.1   | 11                      | CQVWDISSDHGLF   | 10710.T5   |
| WEV         | SKT15 | IGHV4-79*01                                                         | 5.7   | CARQWRTHCTNSGCSRPFYHW     | 19                      | IGLV3-40*01                             | 4.8   | 10                      | CQVWDSSDRSF     | 10710.T6   |
| WEV         | SKT16 | IGHV4-117*01_S6852                                                  | 5.4   | CAREFFREYCNNTGCVGWDNDV    | 19                      | IGLV1-72*02+G267T                       | 4.4   | 11                      | CSAWDSSVSGRVF   | 10710.T7   |
| WEV         | SKT17 | IGHV4-NL_1*02_S9550                                                 | 2.4   | CAKQYCSSTYCYGSLDVG        | 16                      | IGKV2-64*01+<br>G96A.A162C.G177T        | 3.6   | 8                       | CGQGAHLYTF      | 10710.T8   |
| WEV         | SKT18 | IGHV4-NL_1*02_S9550                                                 | 5.1   | CAHSYCPGSDCTDAFDV         | 16                      | IGKV2-64*01+<br>G96A.A162C.G177T        | 3.6   | 10                      | CGQGAHLPMYFS    | 10710.T9   |
| WEV         | SKT19 | IGHV4-NL_28*01_S1005                                                | 7.2   | CARRRSEYCNNTYCTGAFDVG     | 19                      | IGKV3-10*02                             | 8.4   | 8                       | CFQYSSGWF       | 10710.T10  |
| WEV         | SKT20 | IGHV4-NL_5*01_S6960                                                 | 11    | CARSHFCNNTFCYGFVDV        | 17                      | IGKV2-72*02                             | 3     | 9                       | CVQAIAPWTF      | 10710.T11  |
| WEV         | SKT21 | IGHV3-187*01_S1387                                                  | 4     | CALRSPGGDW                | 9                       | IGLV1-64*01                             | 1.7   | 11                      | CLSPDSSLSHFL    | 10710.T12  |
| WEV         | SKT22 | IGHV3-187*01_S1387                                                  | 3.6   | CALRSPGGDW                | 9                       | IGLV1-64*01                             | 0.7   | 11                      | CLSPDSSLSHFL    | 10710.T12  |
| WEV         | SKT23 | IGHV3-187*01_S1387                                                  | 3.6   | CALRSPGGDW                | 9                       | IGLV1-64*01                             | 1.4   | 11                      | CLSPDSSLSHFL    | 10710.T12  |
| WEV         | SKT24 | IGHV3-122*01_S8388                                                  | 2.4   | CTRLGGGPIGDFV             | 12                      | IGLV1-64*01                             | 2.7   | 11                      | CLSPDSRMSGYIF   | 10710.T13  |
| WEV         | SKT25 | IGHV4-NL_13*01_S9273                                                | 4.7   | CASLPNIGGTWGYFYW          | 15                      | IGKV1S4*01+11215                        | 1.4   | 9                       | CQQHNGYPFTF     | 10710.T14  |
| WEV         | SKT26 | IGHV4-NL_13*01_S9273                                                | 3     | CASAINTHDALDFW            | 13                      | IGLV1-64*01                             | 3.4   | 11                      | CLSYDSSLNWV     | 10710.T15  |
| WEV         | SKT27 | IGHV4-NL_13*01_S9273                                                | 3     | CASAINTHDALDFW            | 13                      | IGLV1-64*01                             | 3.7   | 11                      | CLSYDSSLNWV     | 10710.T15  |
| WEV         | SKT28 | IGHV4-NL_1*02_S9550                                                 | 2     | CARHFPPGLY                | 9                       | IGLV1-64*01                             | 1.7   | 11                      | CLSYDSSLNAGLF   | 10710.T16  |

**Table S2: Binding and pseudovirus neutralization of single-specific and triple specific  $\alpha$ -EEV mAbs from representative competition binding groups, related to Figures 1-3.**

A representative mAb was chosen from each competition group (Figures 2 and S2) for (a) single-specific and (b) triple-specific mAbs. ELISA binding is shown as EC50 values (ng/mL) and pseudovirus neutralization is shown as IC50 and IC80 ( $\mu$ g/mL).

**A**

| mAb   | Specificity    | ELISA binding | Pseudovirus neutralization |                    |
|-------|----------------|---------------|----------------------------|--------------------|
|       |                | EC50 (ng/mL)  | IC50 ( $\mu$ g/mL)         | IC80 ( $\mu$ g/mL) |
| SKW11 | $\alpha$ -WEEV | 3.9           | 0.05                       | 0.38               |
| SKW14 | $\alpha$ -WEEV | 4.1           | 0.01                       | 0.03               |
| SKW17 | $\alpha$ -WEEV | 3.9           | 0.02                       | 0.09               |
| SKW19 | $\alpha$ -WEEV | 2.7           | 0.03                       | 0.07               |
| SKW24 | $\alpha$ -WEEV | 3.8           | 0.04                       | 0.26               |
| SKW27 | $\alpha$ -WEEV | 8.3           | 0.03                       | -                  |
| SKE01 | $\alpha$ -EEEV | 14.1          | -                          | -                  |
| SKE13 | $\alpha$ -EEEV | 2.8           | -                          | -                  |
| SKE21 | $\alpha$ -EEEV | 50.1          | 2.45                       | -                  |
| SKE22 | $\alpha$ -EEEV | 15.9          | -                          | -                  |
| SKE26 | $\alpha$ -EEEV | 5.9           | 0.03                       | 0.07               |
| SKE32 | $\alpha$ -EEEV | 22.4          | 1.71                       | -                  |
| SKE33 | $\alpha$ -EEEV | 21.8          | 0.07                       | 0.27               |
| SKV05 | $\alpha$ -VEEV | 29.1          | 9.51                       | -                  |
| SKV08 | $\alpha$ -VEEV | 16.8          | 0.93                       | 4.13               |
| SKV09 | $\alpha$ -VEEV | 9.2           | 0.08                       | 0.18               |
| SKV11 | $\alpha$ -VEEV | 6.6           | 0.20                       | 0.67               |
| SKV16 | $\alpha$ -VEEV | 7.6           | 0.03                       | 0.10               |
| SKV18 | $\alpha$ -VEEV | 6.1           | 0.10                       | 0.24               |
| SKV20 | $\alpha$ -VEEV | 8.5           | 0.04                       | 0.07               |

**B**

| mAb   | Specificity    | ELISA binding | Pseudovirus neutralization |                    |
|-------|----------------|---------------|----------------------------|--------------------|
|       |                | EC50 (ng/mL)  | IC50 ( $\mu$ g/mL)         | IC80 ( $\mu$ g/mL) |
| SKT05 | $\alpha$ -WEEV | 4.4           | 0.04                       | 0.07               |
| SKT14 | $\alpha$ -WEEV | 6.8           | 0.06                       | 0.24               |
| SKT20 | $\alpha$ -WEEV | 4.4           | -                          | -                  |
| SKT23 | $\alpha$ -WEEV | 3.4           | -                          | -                  |
| SKT05 | $\alpha$ -EEEV | 6.9           | 0.04                       | 0.39               |
| SKT20 | $\alpha$ -EEEV | 2.3           | -                          | -                  |
| SKT23 | $\alpha$ -EEEV | 1.5           | -                          | -                  |
| SKT05 | $\alpha$ -VEEV | 11.5          | 0.02                       | 0.06               |
| SKT20 | $\alpha$ -VEEV | 6.2           | 0.27                       | 1.01               |
| SKT23 | $\alpha$ -VEEV | 4.9           | 3.48                       | 15.51              |

**Table S3. Cryo-EM data collection, refinement, and validation statistics for VLPs and VLP-Fab complexes, related to Figures 4-6.**

| VLP                                    | WEEV<br>(EMD-27389)<br>(PDB 8DEC) | WEEV-SKT05<br>(EMD-28119)               | WEEV-SKW11<br>(EMD-28118)               | WEEV-SKW19<br>(EMD-28115)               | WEEV-SKW24<br>(EMD-28116)               |
|----------------------------------------|-----------------------------------|-----------------------------------------|-----------------------------------------|-----------------------------------------|-----------------------------------------|
| <b>Data collection and processing</b>  |                                   |                                         |                                         |                                         |                                         |
| Magnification                          | 105,000                           | 105,000                                 | 105,000                                 | 105,000                                 | 105,000                                 |
| Voltage (kV)                           | 300                               | 300                                     | 300                                     | 300                                     | 300                                     |
| Electron exposure (e-/Å <sup>2</sup> ) | 43.5                              | 46.5                                    | 46.5                                    | 46.5                                    | 46.5                                    |
| Defocus range (µm)                     | -0.7 to -2.0                      | -0.8 to -2.0                            | -0.8 to -2.0                            | -0.8 to -2.0                            | -0.8 to -2.0                            |
| Pixel size (Å)                         | 1.245                             | 1.66                                    | 1.66                                    | 1.245                                   | 1.245                                   |
| Symmetry imposed                       | Icosahedral                       | Icosahedral                             | Icosahedral                             | Icosahedral                             | Icosahedral                             |
| Init. particle images (no.)            | 25,165                            | 106,673                                 | 53,774                                  | 46,554                                  | 55,490                                  |
| Final particle images (no.)            | 15,890                            | 68,491                                  | 34,151                                  | 28,914                                  | 33,238                                  |
| Map resolution (Å)                     | 4.7                               | 5.7                                     | 6.1                                     | 6.3                                     | 6.5                                     |
| FSC threshold                          | 0.143                             | 0.143                                   | 0.143                                   | 0.143                                   | 0.143                                   |
| <b>Spike</b>                           |                                   |                                         |                                         |                                         |                                         |
|                                        | WEEV<br>(EMD-27391)<br>(PDB 8DEE) | WEEV-SKT05<br>(EMD-27722)<br>(PDB 8DUL) | WEEV-SKW11<br>(EMD-27723)<br>(PDB 8DUN) | WEEV-SKW19<br>(EMD-27390)<br>(PDB 8DED) | WEEV-SKW24<br>(EMD-27392)<br>(PDB 8DEF) |
| <b>Data collection and processing</b>  |                                   |                                         |                                         |                                         |                                         |
| Magnification                          | 105,000                           | 105,000                                 | 105,000                                 | 105,000                                 | 105,000                                 |
| Voltage (kV)                           | 300                               | 300                                     | 300                                     | 300                                     | 300                                     |
| Electron exposure (e-/Å <sup>2</sup> ) | 43.5                              | 46.5                                    | 46.5                                    | 46.5                                    | 46.5                                    |
| Defocus range (µm)                     | -0.7 to -2.0                      | -0.8 to -2.0                            | -0.8 to -2.0                            | -0.8 to -2.0                            | -0.8 to -2.0                            |
| Pixel size (Å)                         | 1.245                             | 1.66                                    | 1.66                                    | 1.245                                   | 1.245                                   |
| Symmetry imposed                       | C1                                | C1                                      | C1                                      | C1                                      | C1                                      |
| Init. particle images (no.)            | 15,890                            | 68,491                                  | 34,151                                  | 28,940                                  | 33,238                                  |
| Final particle images (no.)            | 953,400                           | 4,109,460                               | 854,520                                 | 1,736,400                               | 1,994,280                               |
| Map resolution (Å)                     | 3.4                               | 4.2                                     | 5.8                                     | 4.1                                     | 4.2                                     |
| FSC threshold                          | 0.143                             | 0.143                                   | 0.143                                   | 0.143                                   | 0.143                                   |
| <b>Refinement</b>                      |                                   |                                         |                                         |                                         |                                         |
| Model used (PDB code)                  | 7FFE                              | 8DEE                                    | 8DEE                                    | 8DEE                                    | 8DEE                                    |
| Model resolution (Å)                   | 3.5                               | 4.3                                     |                                         | 4.2                                     | 4.3                                     |
| FSC threshold                          | 0.143                             | 0.143                                   | 0.143                                   | 0.143                                   | 0.143                                   |
| <b>Model composition</b>               |                                   |                                         |                                         |                                         |                                         |
| Non-hydrogen atoms                     | 30,716                            | 14,203                                  | 20,499                                  | 20,450                                  | 22,071                                  |
| Protein residues                       | 4,000                             | 1,802                                   | 2,876                                   | 2,662                                   | 2,868                                   |
| <b>Ligands</b>                         |                                   |                                         |                                         |                                         |                                         |
| <i>B</i> factors (Å <sup>2</sup> )     |                                   |                                         |                                         |                                         |                                         |
| Protein                                | 75.8                              | 226.5                                   | 481.0                                   | 87.2                                    | 178.3                                   |
| Ligand                                 |                                   |                                         |                                         |                                         |                                         |
| <b>R.m.s. deviations</b>               |                                   |                                         |                                         |                                         |                                         |
| Bond lengths (Å)                       | 0.004                             | 0.005                                   | 0.007                                   | 0.007                                   | 0.004                                   |
| Bond angles (°)                        | 0.76                              | 1.27                                    | 1.32                                    | 0.90                                    | 0.84                                    |
| <b>Validation</b>                      |                                   |                                         |                                         |                                         |                                         |
| MolProbity score                       | 1.5                               | 1.7                                     | 1.7                                     | 1.9                                     | 1.8                                     |
| Clashscore                             | 4.0                               | 6.1                                     | 5.3                                     | 10.0                                    | 7.1                                     |
| Poor rotamers (%)                      | 0.2                               | 0.1                                     | 0.0                                     | 0.0                                     | 0.0                                     |
| <b>Ramachandran plot</b>               |                                   |                                         |                                         |                                         |                                         |
| Favored (%)                            | 95.4                              | 94.7                                    | 94.2                                    | 94.1                                    | 93.8                                    |
| Allowed (%)                            | 4.5                               | 5.3                                     | 5.8                                     | 5.8                                     | 6.2                                     |
| Disallowed (%)                         | 0.1                               | 0.0                                     | 0.0                                     | 0.1                                     | 0.0                                     |

Table S3 (continued)

| VLP                                                 | EEEV-SKE26<br>(EMD-28117)               | VEEV-SKT05<br>(EMD-28056)               | VEEV-SKV09<br>(EMD-28187)               | VEEV-SKV16<br>(EMD-28188)               | VEEV-SKT20<br>(EMD-28059)               |
|-----------------------------------------------------|-----------------------------------------|-----------------------------------------|-----------------------------------------|-----------------------------------------|-----------------------------------------|
| <b>Data collection and processing</b>               |                                         |                                         |                                         |                                         |                                         |
| Magnification                                       | 105,000                                 | 81,000                                  | 105,000                                 | 105,000                                 | 105,000                                 |
| Voltage (kV)                                        | 300                                     | 300                                     | 300                                     | 300                                     | 300                                     |
| Electron exposure (e <sup>-</sup> /Å <sup>2</sup> ) | 58.06                                   | 53.8                                    | 58.06                                   | 58.06                                   | 47.6                                    |
| Defocus range (µm)                                  | -0.7 to -2.0                            | -0.5 to -2.0                            | -0.8 to -2.0                            | -0.8 to -2.0                            | -0.75 to -2.25                          |
| Pixel size (Å)                                      | 1.66                                    | 1.056                                   | 1.245                                   | 1.245                                   | 1.23                                    |
| Symmetry imposed                                    | Icosahedral                             | Icosahedral                             | Icosahedral                             | Icosahedral                             | Icosahedral                             |
| Initial particle images (no.)                       | 78,534                                  | 172,425                                 | 82,810                                  | 37,456                                  | 36,125                                  |
| Final particle images (no.)                         | 51,190                                  | 67,814                                  | 53,462                                  | 23,152                                  | 11,336                                  |
| Map resolution (Å)                                  | 3.7                                     | 4.1                                     | 7.0                                     | 6.0                                     | 4.7                                     |
| FSC threshold                                       | 0.143                                   | 0.143                                   | 0.143                                   | 0.143                                   | 0.143                                   |
| <b>Spike</b>                                        |                                         |                                         |                                         |                                         |                                         |
|                                                     | EEEV-SKE26<br>(EMD-27757)<br>(PDB 8DWO) | VEEV-SKT05<br>(EMD-28058)<br>(PDB 8EEU) | VEEV-SKV09<br>(EMD-27395)<br>(PDB 8DEQ) | VEEV-SKV16<br>(EMD-27396)<br>(PDB 8DER) | VEEV-SKT20<br>(EMD-28060)<br>(PDB 8EEV) |
| <b>Data collection and processing</b>               |                                         |                                         |                                         |                                         |                                         |
| Magnification                                       | 105,000                                 | 81,000                                  | 105,000                                 | 105,000                                 | 105,000                                 |
| Voltage (kV)                                        | 300                                     | 300                                     | 300                                     | 300                                     | 300                                     |
| Electron exposure (e <sup>-</sup> /Å <sup>2</sup> ) | 58.06                                   | 53.8                                    | 58.06                                   | 58.06                                   | 47.6                                    |
| Defocus range (µm)                                  | -0.7 to -2.0                            | -0.5 to -2.0                            | -0.8 to -2.0                            | -0.8 to -2.0                            | -0.75 to -2.25                          |
| Pixel size (Å)                                      | 1.66                                    | 1.056                                   | 1.245                                   | 1.245                                   | 1.23                                    |
| Symmetry imposed                                    | C1                                      | C1                                      | C1                                      | C1                                      | C1                                      |
| Initial particle images (no.)                       | 51,190                                  | 4,068,840                               | 53,462                                  | 23,152                                  | 680,160                                 |
| Final particle images (no.)                         | 3,071,400                               | 190,096                                 | 83,637                                  | 1,389,120                               | 28,235                                  |
| Map resolution (Å)                                  | 3.4                                     | 3.5                                     | 6.0                                     | 3.4                                     | 3.6                                     |
| FSC threshold                                       | 0.143                                   | 0.143                                   | 0.143                                   | 0.143                                   | 0.143                                   |
| <b>Refinement</b>                                   |                                         |                                         |                                         |                                         |                                         |
| Initial model used (PDB code)                       | 6XO4                                    | 7FFE                                    | 7FFE                                    | 7FFE                                    | 7FFE                                    |
| Model resolution (Å)                                | 3.5                                     | 3.5                                     |                                         | 3.5                                     | 3.6                                     |
| FSC threshold                                       | 0.143                                   | 0.143                                   | 0.143                                   | 0.143                                   | 0.143                                   |
| Model composition                                   |                                         |                                         |                                         |                                         |                                         |
| Non-hydrogen atoms                                  | 22,572                                  | 19,127                                  | 23,306                                  | 22,666                                  | 21,011                                  |
| Protein residues                                    | 2,916                                   | 2,471                                   | 3,041                                   | 2,921                                   | 2,713                                   |
| Ligands                                             |                                         |                                         |                                         | 10                                      |                                         |
| <i>B</i> factors (Å <sup>2</sup> )                  |                                         |                                         |                                         |                                         |                                         |
| Protein                                             | 70.1                                    | 73.1                                    | 63.4                                    | 70.78                                   | 70.2                                    |
| Ligand                                              |                                         |                                         |                                         |                                         |                                         |
| R.m.s. deviations                                   |                                         |                                         |                                         |                                         |                                         |
| Bond lengths (Å)                                    | 0.004                                   | 0.01                                    | 0.006                                   | 0.005                                   | 0.007                                   |
| Bond angles (°)                                     | 0.802                                   | 0.89                                    | 1.16                                    | 0.86                                    | 0.86                                    |
| Validation                                          |                                         |                                         |                                         |                                         |                                         |
| MolProbity score                                    | 1.8                                     | 1.77                                    | 2.0                                     | 1.5                                     | 1.84                                    |
| Clashscore                                          | 6.5                                     | 4.07                                    | 14.6                                    | 4.4                                     | 4.73                                    |
| Poor rotamers (%)                                   | 0.4                                     | 0.05                                    | 0.1                                     | 0.0                                     | 0.0                                     |
| Ramachandran plot                                   |                                         |                                         |                                         |                                         |                                         |
| Favored (%)                                         | 92.4                                    | 88.92                                   | 95.2                                    | 95.8                                    | 88.12                                   |
| Allowed (%)                                         | 7.6                                     | 10.92                                   | 4.7                                     | 4.2                                     | 11.62                                   |
| Disallowed (%)                                      | 0.0                                     | 0.16                                    | 0.1                                     | 0.0                                     | 0.26                                    |

**Table S4. Epitope characteristics, related to Figure 4.****Heavy chain**

|                                                                 | EEEV-SKE26 | VEEV-SKT05 | VEEV-SKT20 | VEEV-SKV09 | VEEV-SKV16 | WEEV-SKT05 | WEEV-SKW11 | WEEV-SKW19 | WEEV-SKW24 |
|-----------------------------------------------------------------|------------|------------|------------|------------|------------|------------|------------|------------|------------|
| Sequence variation (BSA weighted average of normalized entropy) | 0.37       | 0.35       | 0.23       | 0.73       | 0.57       | 0.32       | 0.33       | 0.52       | 0.60       |
| Conformational variability (RMSD, Å)                            | 2.7        | 2.5        | 3.0        | 3.8        | 4.3        | 2.5        | 2.5        | 5.8        | 6.5        |
| Surface area (Å <sup>2</sup> )                                  | 925        | 520        | 759        | 698        | 656        | 466        | 285        | 615        | 579        |
| E1/E2 binding(Å <sup>2</sup> )                                  | 6/919      | 520/0      | 464/295    | 698/0      | 0/656      | 466/0      | 0/285      | 95/520     | 58/522     |
| Side chain/main chain recognition(Å <sup>2</sup> )              | 763/162    | 429/92     | 698/61     | 605/93     | 582/74     | 376/90     | 231/54     | 505/110    | 516/63     |

**Light chain**

|                                                                 | EEEV-SKE26 | VEEV-SKT05 | VEEV-SKT20 | VEEV-SKV09 | VEEV-SKV16 | WEEV-SKT05 | WEEV-SKW11 | WEEV-SKW19 | WEEV-SKW24 |
|-----------------------------------------------------------------|------------|------------|------------|------------|------------|------------|------------|------------|------------|
| Sequence variation (BSA weighted average of normalized entropy) | 0.58       | 0.29       | 0.0        | 0.66       | -          | 0.29       | 0.54       | -          | 0.58       |
| Conformational variability (RMSD, Å)                            | 4.7        | 2.2        | 4.4        | 3.5        | -          | 2.3        | 3.7        | -          | 4.0        |
| Surface area (Å <sup>2</sup> )                                  | 325        | 465        | 211        | 464        | -          | 617        | 343        | -          | 338        |
| E1/E2 binding(Å <sup>2</sup> )                                  | 0/325      | 439/26     | 211/0      | 464/0      | -          | 617/0      | 0/343      | -          | 0/338      |
| Side chain/main chain recognition(Å <sup>2</sup> )              | 290/35     | 430/34     | 210/1      | 399/65     | -          | 539/79     | 275/67     | -          | 311/27     |

**Table S5. Contribution of residues to binding surface for VEEV-SKT05 (top) and WEEV-SKT05 (bottom), related to Figures 5-6.**

| SKT05              |      |                    | VEEV      |      |                    |
|--------------------|------|--------------------|-----------|------|--------------------|
| Residue            | Bond | BSA Å <sup>2</sup> | Residue   | Bond | BSA Å <sup>2</sup> |
| <b>Heavy chain</b> |      |                    |           |      |                    |
| H:ASP 31           |      | 16.07              | A:SER 65  |      | 22.16              |
| H:SER 32           |      | 4.93               | A:GLN 66  |      | 7.52               |
| H:TRP 33           |      | 0.89               | A:GLU 67  | HS   | 112.51             |
| H:ASP 53           |      | 4.79               | A:CYS 68  | H    | 44.03              |
| H:ARG 94           | HS   | 16.05              | A:THR 69  |      | 3.67               |
| H:ASP 95           |      | 3.19               | A:PRO 70  |      | 61.43              |
| H:ASP 96           |      | 32.05              | A:TYR 72  |      | 22.87              |
| H:ARG 97           | HS   | 83.01              | A:ARG 73  |      | 0.49               |
| H:THR 98           | H    | 47.36              | A:PRO 74  |      | 0.67               |
| H:SER 99           |      | 29.64              | A:ASP 75  | HS   | 28.50              |
| H:CYS 100          | H    | 68.35              | A:GLU 76  | H    | 43.34              |
| H:ARG 100A         |      | 39.84              | A:GLN 77  |      | 40.56              |
| H:ARG 100B         | HS   | 114.84             | A:CYS 78  | H    | 34.57              |
| H:GLY 100C         |      | 38.70              | A:LYS 79  |      | 20.01              |
| H:CYS 100E         |      | 10.09              | A:VAL 80  | H    | 32.39              |
| H:HIS 101          |      | 11.59              | A:TYR 214 |      | 7.76               |
|                    |      |                    | A:ALA 215 | H    | 11.85              |
|                    |      |                    | A:ASN 216 |      | 10.34              |
|                    |      |                    | A:ASN 218 |      | 4.79               |
|                    |      |                    | A:VAL 220 |      | 3.52               |
| <b>Light chain</b> |      |                    |           |      |                    |
| L:PHE 31           |      | 30.28              | A:GLY 64  |      | 1.10               |
| L:ARG 46           |      | 1.17               | A:SER 65  |      | 3.68               |
| L:TYR 49           |      | 54.92              | A:LYS 79  | S    | 59.76              |
| L:ASP 50           |      | 12.08              | A:VAL 80  |      | 34.14              |
| L:SER 52           |      | 8.83               | A:PHE 81  |      | 13.22              |
| L:GLU 53           | S    | 82.07              | A:THR 82  | H    | 75.90              |
| L:LEU 54           | H    | 32.81              | A:THR 98  |      | 47.28              |
| L:GLN 55           |      | 0.50               | A:GLU 99  |      | 45.85              |
| L:GLY 56           |      | 42.61              | A:ARG 223 |      | 27.89              |
| L:GLY 57           |      | 25.94              |           |      |                    |
| L:VAL 58           |      | 9.85               |           |      |                    |
| L:SER 60           |      | 13.95              |           |      |                    |

| SKT05              |      |                    | WEEV      |      |                    |
|--------------------|------|--------------------|-----------|------|--------------------|
| Residue            | Bond | BSA Å <sup>2</sup> | Residue   | Bond | BSA Å <sup>2</sup> |
| <b>Heavy chain</b> |      |                    |           |      |                    |
| H:ASP 31           |      | 10.62              | F:SER 65  | H    | 37.65              |
| H:SER 32           |      | 2.52               | F:LEU 66  |      | 2.82               |
| H:ARG 94           |      | 8.16               | F:GLU 67  | HS   | 91.97              |
| H:ASP 95           |      | 1.96               | F:CYS 68  |      | 36.12              |
| H:ASP 96           | H    | 29.53              | F:LYS 69  |      | 5.02               |
| H:ARG 97           | HS   | 75.92              | F:ALA 70  |      | 59.41              |
| H:THR 98           | H    | 48.35              | F:SER 71  |      | 6.99               |
| H:SER 99           |      | 31.42              | F:ASP 75  | HS   | 22.29              |
| H:CYS 100          | H    | 63.17              | F:TYR 76  |      | 37.16              |
| H:ARG 100A         |      | 26.54              | F:THR 77  |      | 21.65              |
| H:ARG 100B         | HS   | 103.81             | F:CYS 78  | H    | 38.79              |
| H:GLY 100C         |      | 28.93              | F:ARG 79  |      | 19.02              |
| H:CYS 100E         |      | 8.77               | F:VAL 80  | H    | 36.07              |
| H:HIS 101          |      | 16.05              | F:MET 195 |      | 1.51               |
|                    |      |                    | F:ALA 215 | H    | 7.60               |
|                    |      |                    | F:ARG 216 |      | 27.88              |
|                    |      |                    | F:ASP 218 |      | 10.99              |
|                    |      |                    | F:ILE 219 |      | 1.72               |
| <b>Light chain</b> |      |                    |           |      |                    |
| L:PHE 31           |      | 39.87              | F:CYS 63  |      | 1.72               |
| L:TYR 32           |      | 5.93               | F:SER 65  |      | 10.54              |
| L:ARG 46           |      | 2.19               | F:ARG 79  |      | 65.11              |
| L:TYR 49           |      | 43.29              | F:VAL 80  |      | 45.04              |
| L:ASP 50           |      | 25.48              | F:PHE 81  |      | 8.05               |
| L:SER 52           |      | 19.95              | F:GLY 82  |      | 31.14              |
| L:GLU 53           |      | 59.66              | F:GLY 83  |      | 4.51               |
| L:LEU 54           |      | 27.07              | F:SER 98  |      | 15.47              |
| L:GLY 56           |      | 41.39              | F:GLU 99  | H    | 65.74              |
| L:GLY 57           | H    | 19.92              | F:ASN 100 |      | 8.29               |
| L:VAL 58           |      | 7.51               | F:THR 101 |      | 17.59              |
| L:SER 60           |      | 4.03               | F:LEU 221 |      | 0.12               |
|                    |      |                    | F:LYS 223 |      | 31.34              |

BSA: Buried Surface Area, Å<sup>2</sup>  
HSDC: Residues making Hydrogen/Disulphide bond, Salt bridge or Covalent link  
|||: Buried area percentage, one bar per 10%
