# Supplementary material
Source: PubMed Central journal article supplement (PMC10411218)

Figure S2

**A**  $\alpha$ -WEEV mAbs

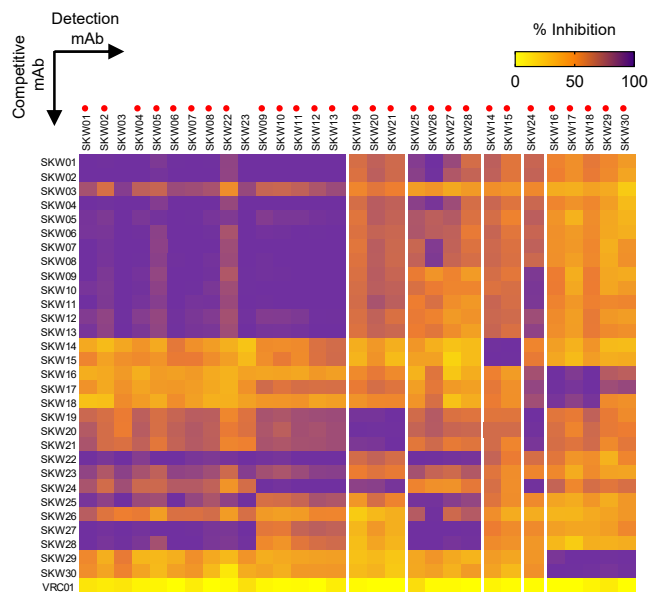

**B**  $\alpha$ -VEEV mAbs

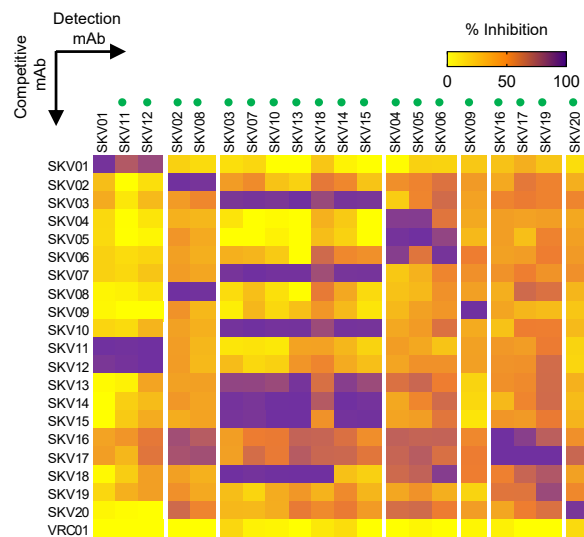

**C**  $\alpha$ -WEVEEV mAbs (WEEV VLP)

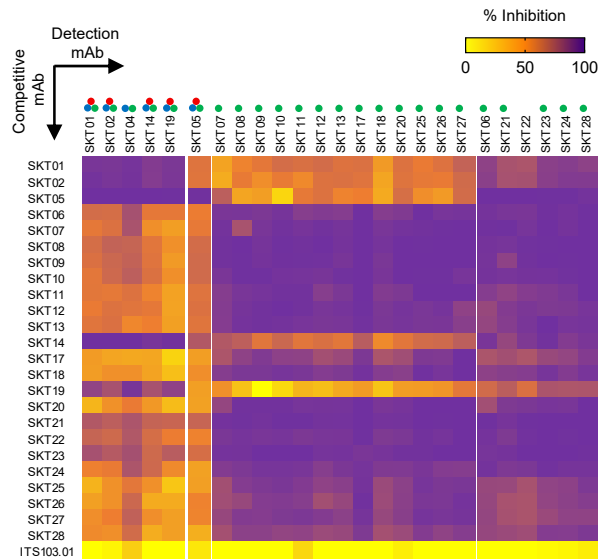

**D**  $\alpha$ -WEVEEV mAbs (VEEV VLP)

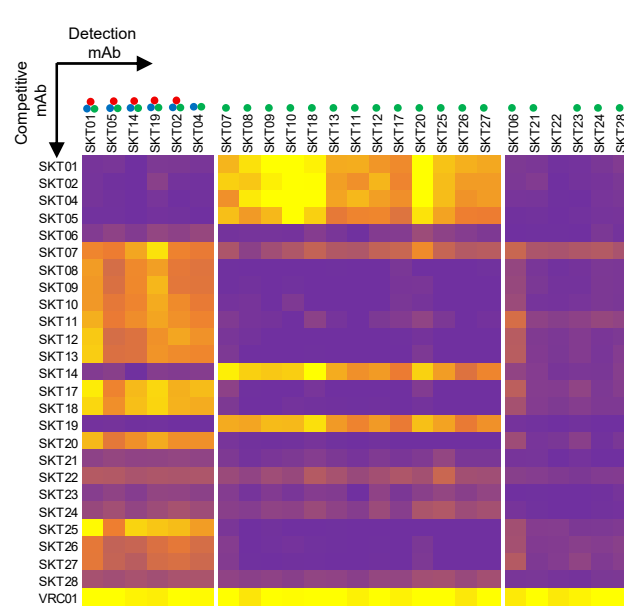

Supplement: NIHMS1906962-supplement-4.pdf [file NIHMS1906962-supplement-4.pdf]
