# Supplementary material
Source: PubMed Central journal article supplement (PMC10411218)

Figure S1

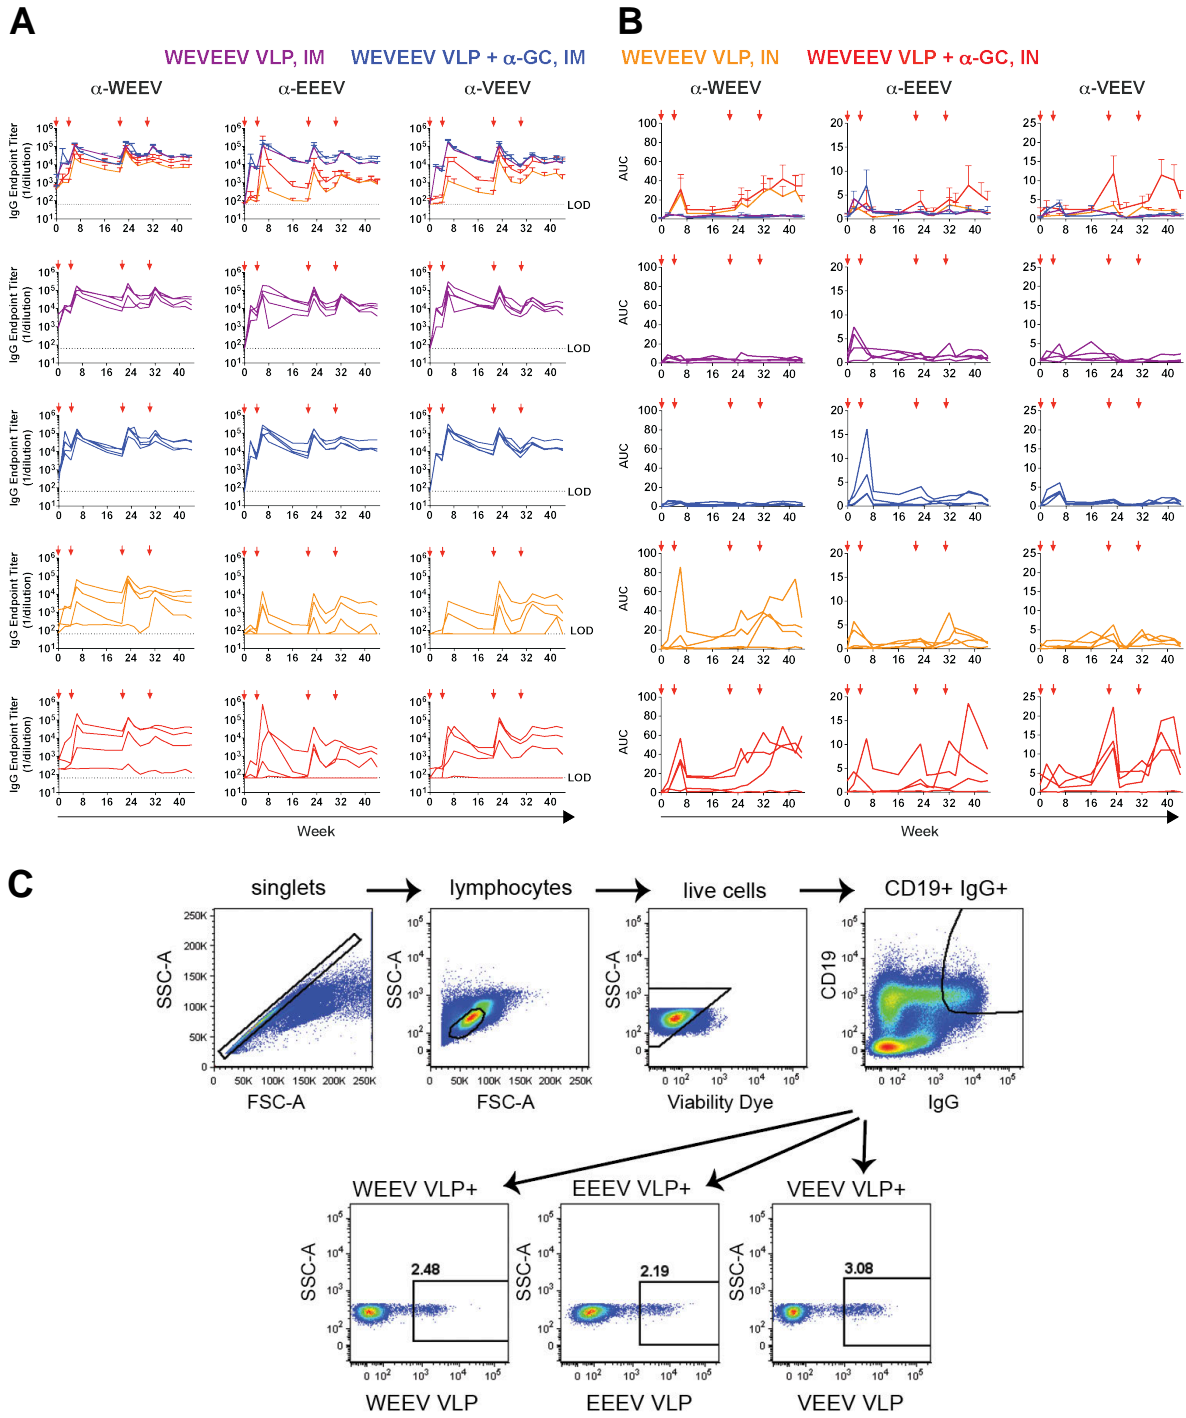

Supplement: NIHMS1906962-supplement-3.pdf [file NIHMS1906962-supplement-3.pdf]

Figure S3

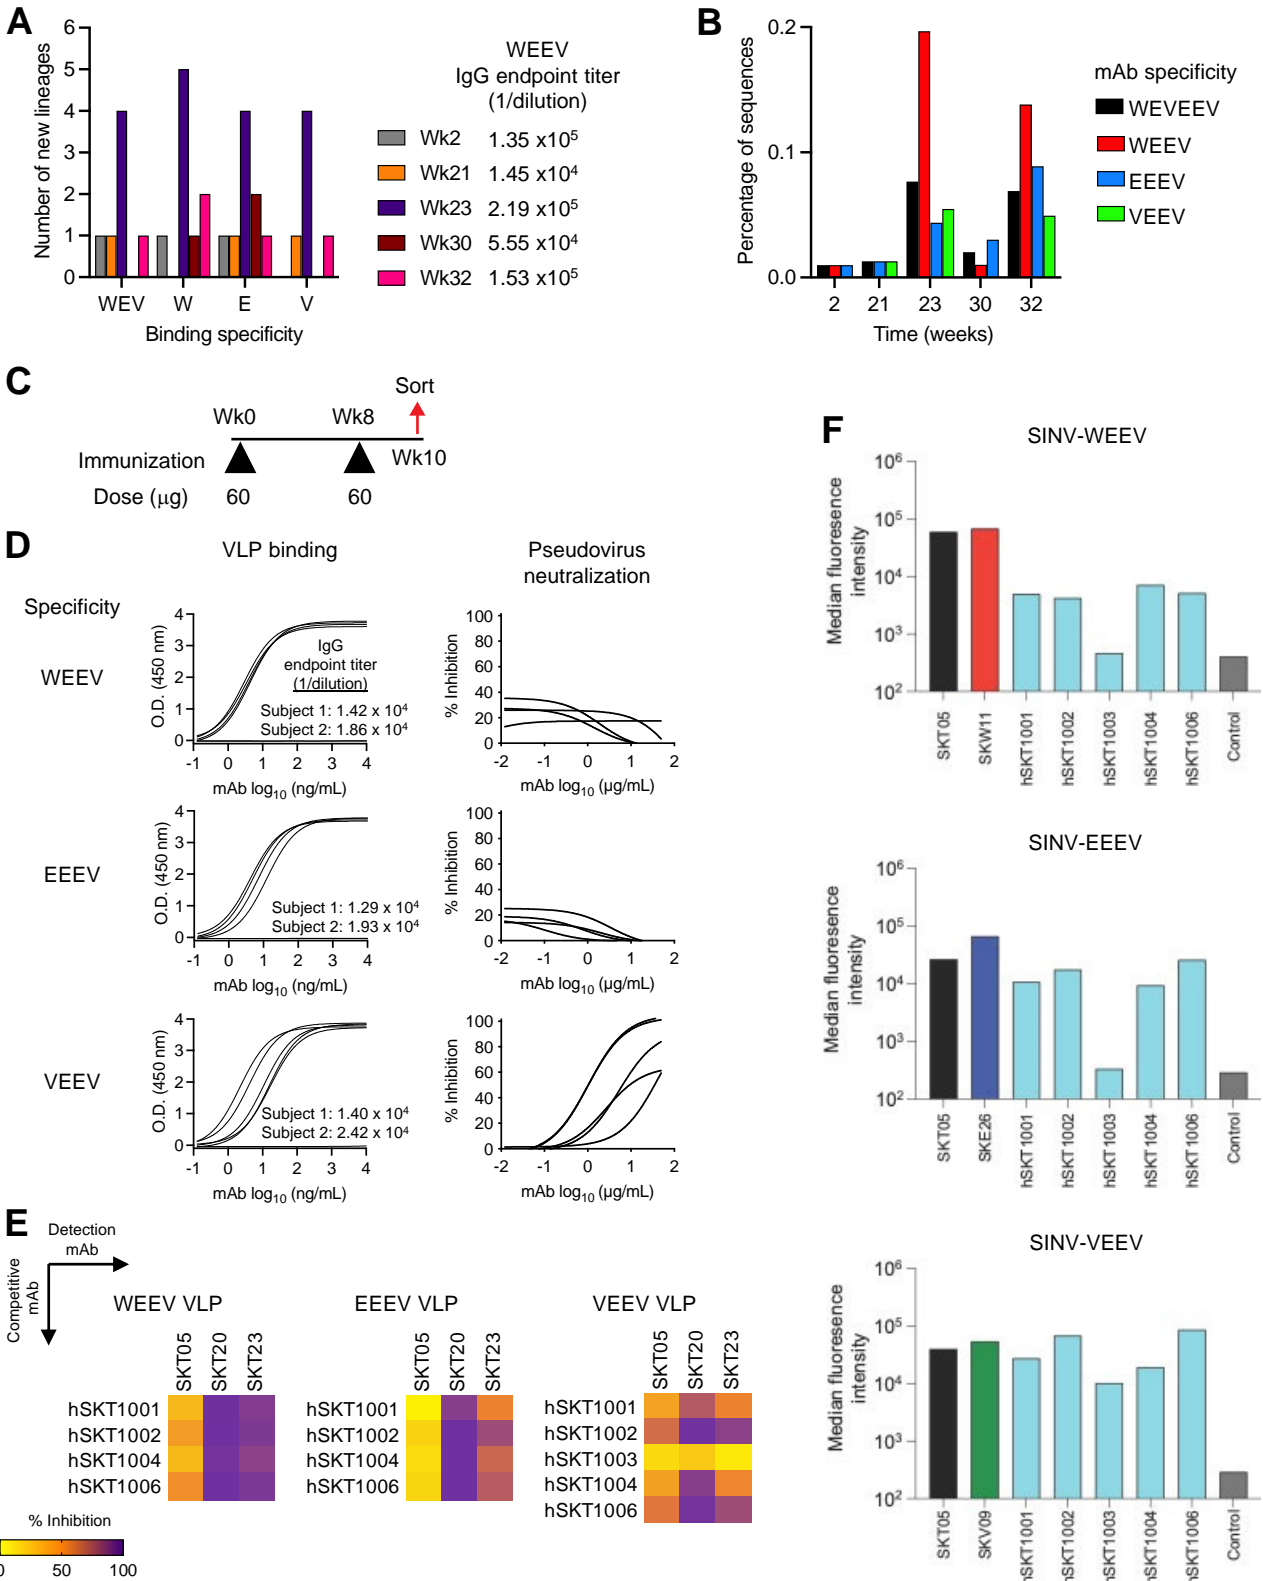

Supplement: NIHMS1906962-supplement-5.pdf [file NIHMS1906962-supplement-5.pdf]

Figure S4

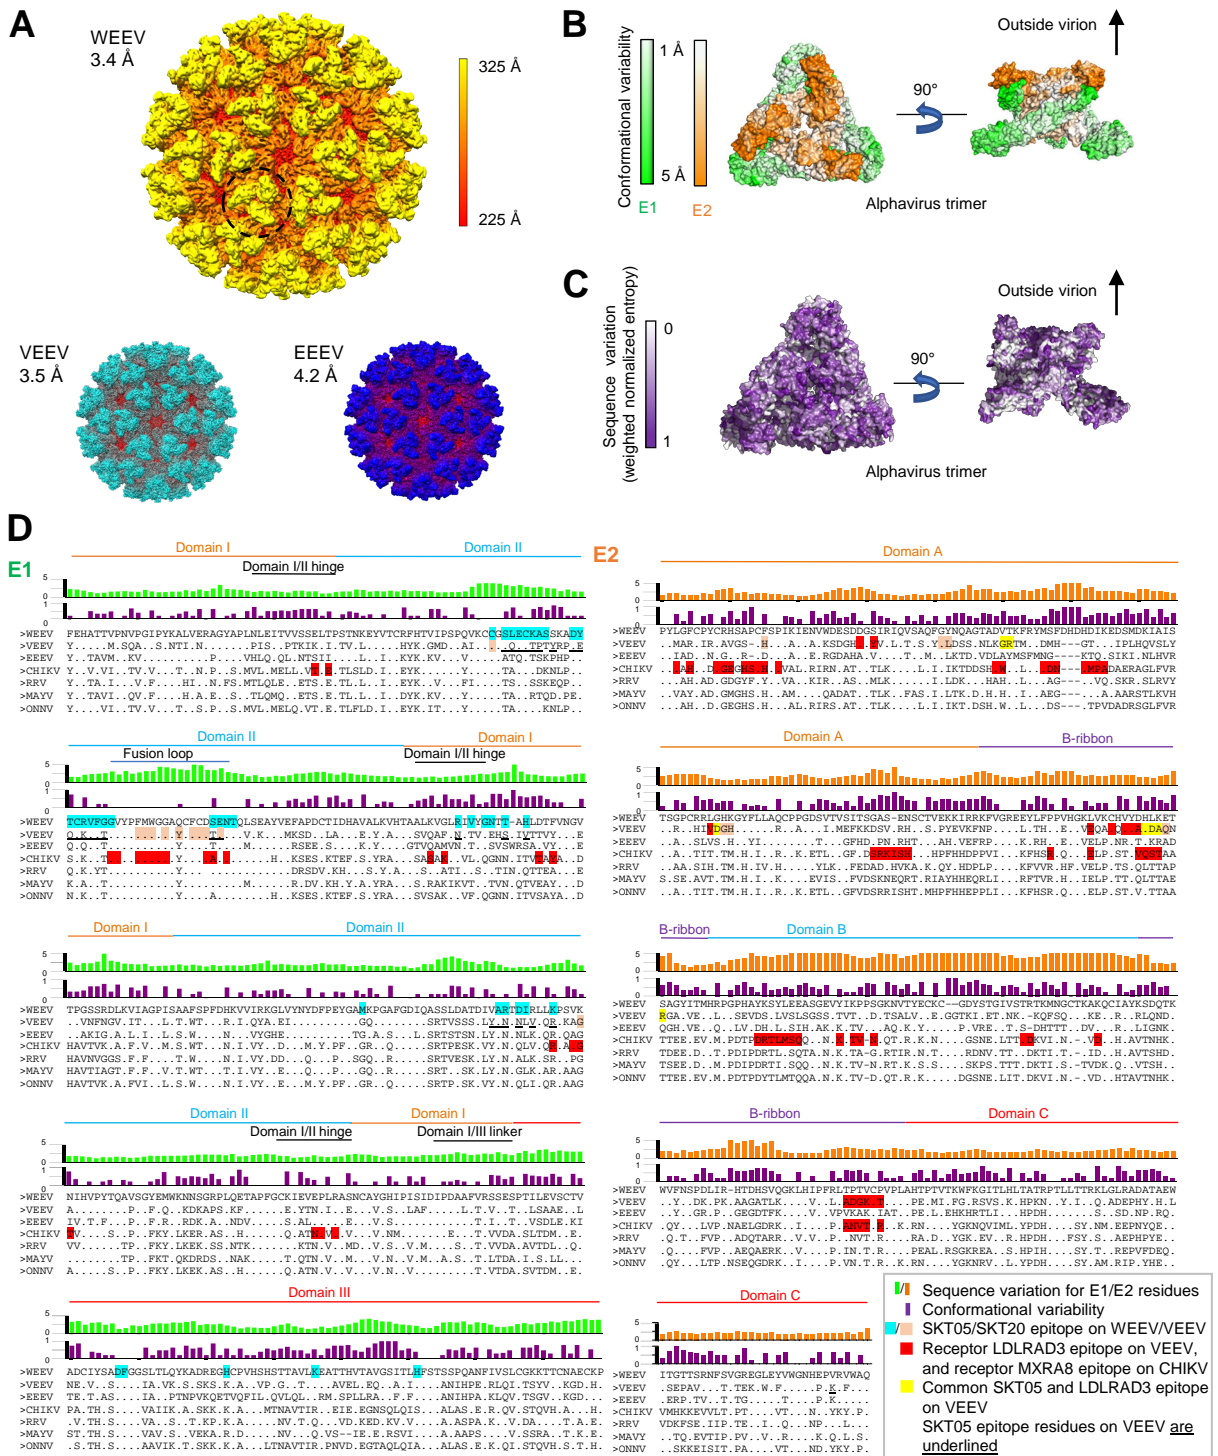

Supplement: NIHMS1906962-supplement-6.pdf [file NIHMS1906962-supplement-6.pdf]

Figure S5

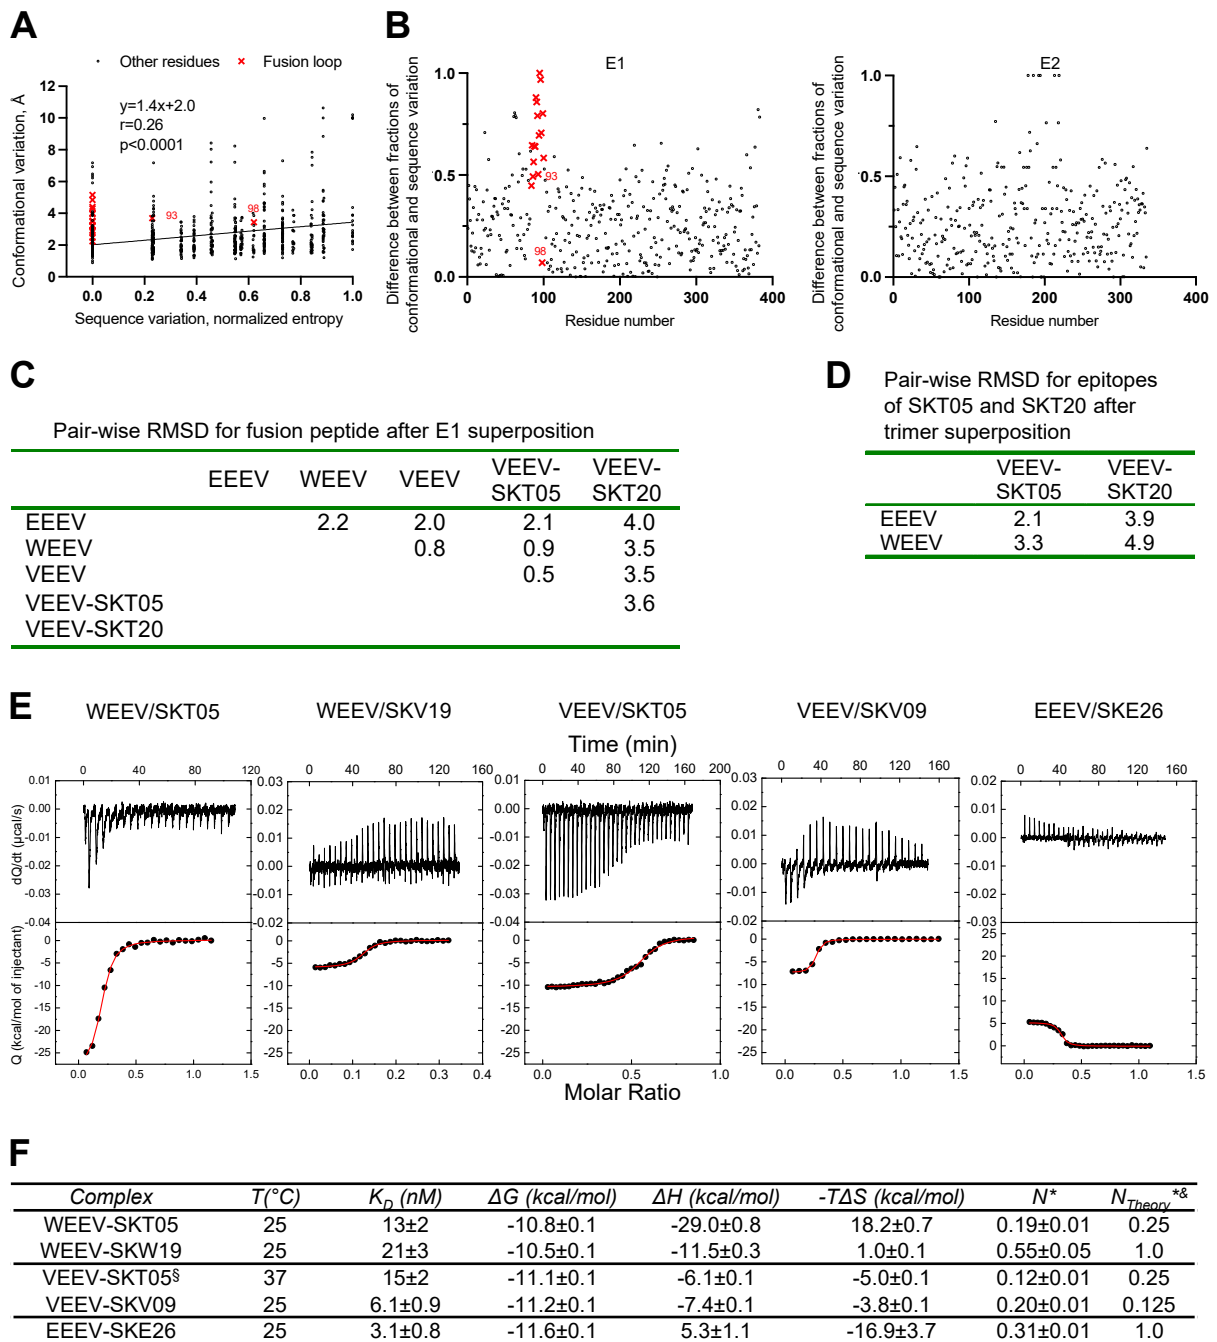

Supplement: NIHMS1906962-supplement-7.pdf [file NIHMS1906962-supplement-7.pdf]

Figure S6

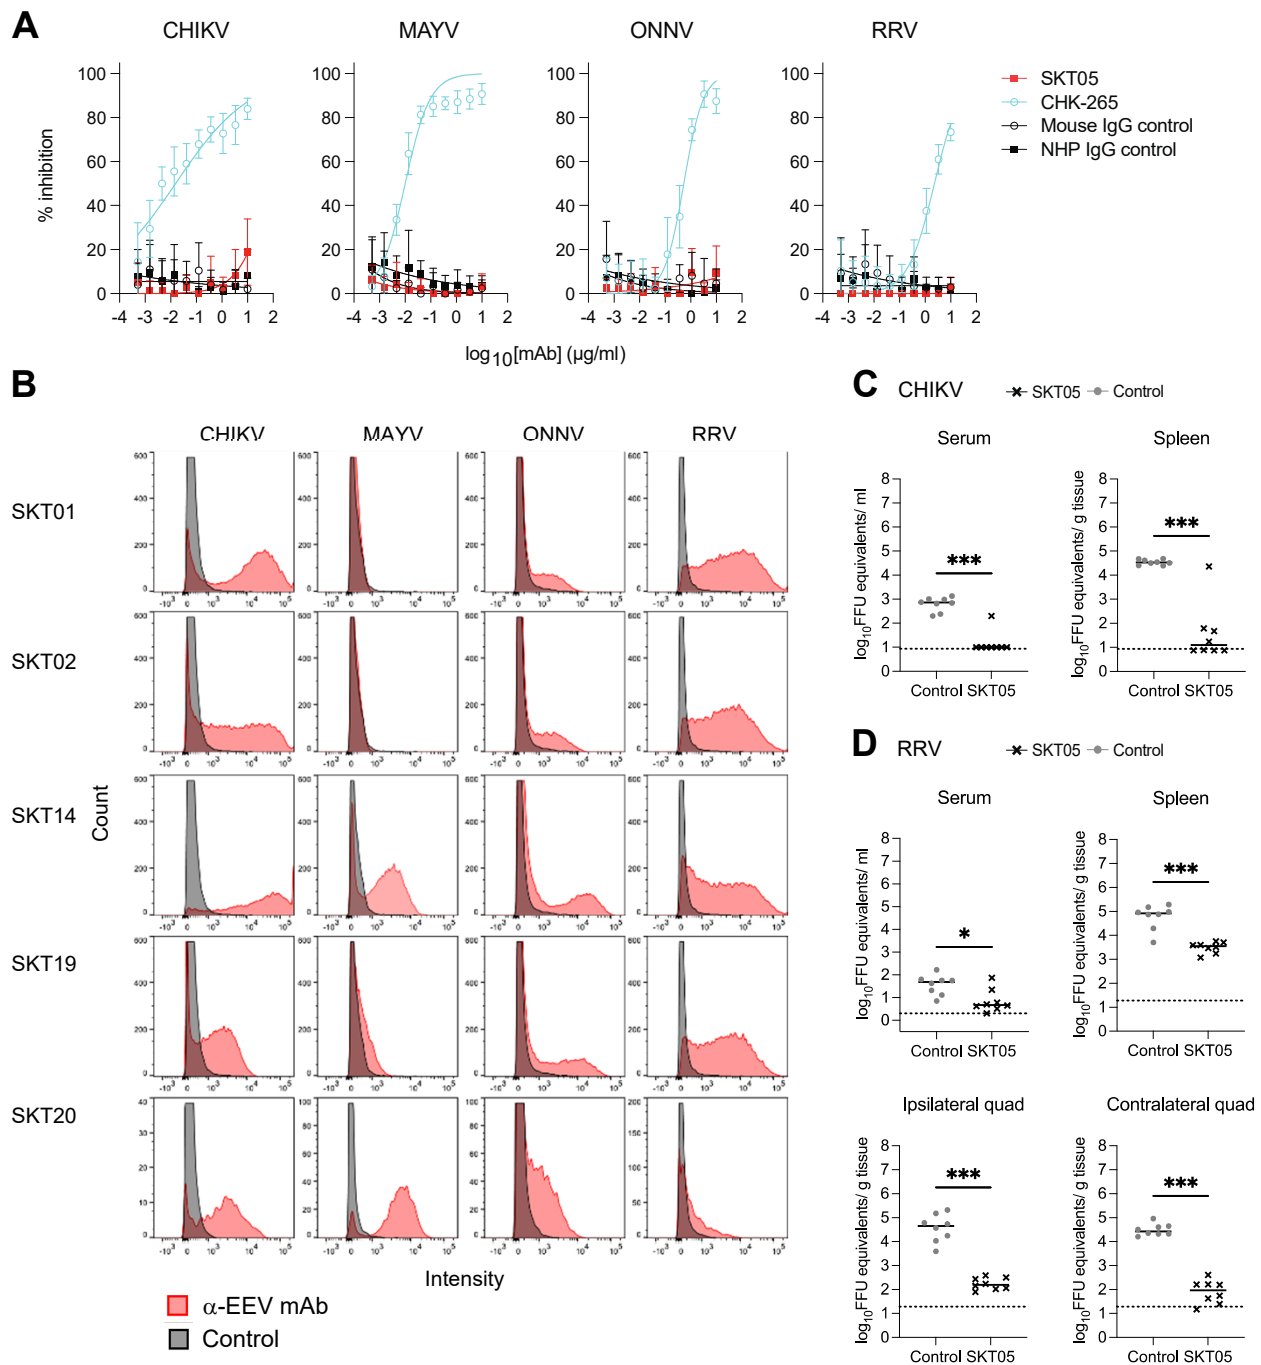

Supplement: NIHMS1906962-supplement-8.pdf [file NIHMS1906962-supplement-8.pdf]

Figure S7

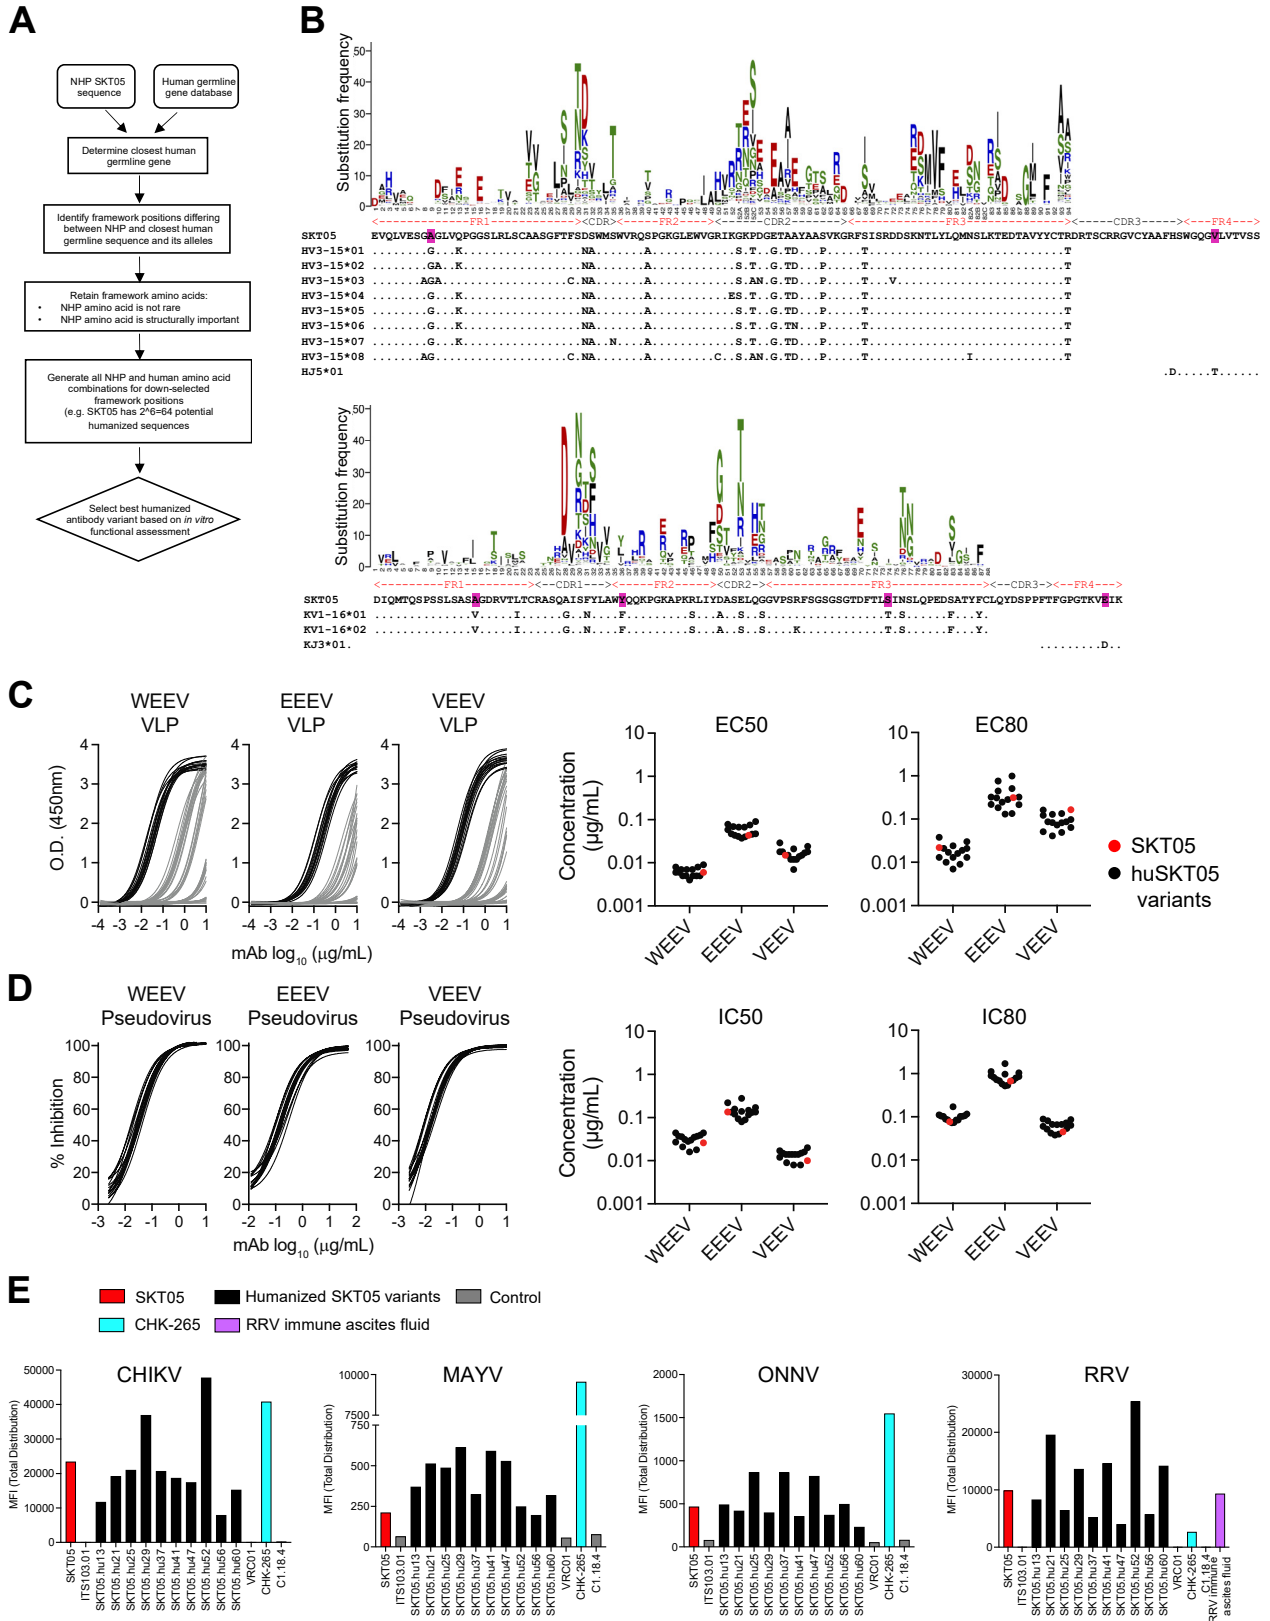

Supplement: NIHMS1906962-supplement-9.pdf [file NIHMS1906962-supplement-9.pdf]
